# Supplementary material for: Homogeneity Assessment and Correction Methodology for the 1980–2022 Daily Temperature Series in Padua, Italy
Source: MDPI journal article supplement (doi:10.3390/cli11120244), 2023-12-15
Supplement: s1 [file s1]

## Supplementary Material

### Article title: Homogeneity Assessment and Correction Methodology for the 1980–2022 Daily Temperature Series in Padua, Italy

Claudio Stefanini <sup>1</sup>, Francesca Becherini <sup>2,\*</sup>, Antonio della Valle <sup>3</sup>, Francesco Rech <sup>4</sup>, Fabio Zecchini <sup>4</sup> and Dario Camuffo <sup>3</sup>

<sup>1</sup> Department of Environmental Sciences, Informatics and Statistics, Ca' Foscari University of Venice, 30170 Venice Mestre, Italy

<sup>2</sup> National Research Council-Institute of Polar Sciences, Via Torino 155, 30172 Venice Mestre, Italy

<sup>3</sup> National Research Council-Institute of Atmospheric Sciences and Climate, Corso Stati Uniti 4, 35127 Padua, Italy

<sup>4</sup> Regional Agency for Environmental Protection and Prevention of Veneto, Via Ospedale Civile 24, 35121 Padua, Italy

\* Correspondence: francesca.becherini@cnr.it

**Table S1.** Transfer functions from *OB\_UNIPD* of the period 1 Jan 1980 – 23 Oct 1990 to *OB\_ARPAV* for minimum temperature.

| 1980-2022 | <i>OB_UNIPD</i> (1 Jan 1980 – 23 Oct 1990) to <i>OB_ARPAV</i> |                |
|-----------|---------------------------------------------------------------|----------------|
| Month     | Tmin (°C)                                                     | r <sup>2</sup> |
| January   | $Y = 0.9768 \cdot X - 0.44$                                   | 0.991          |
| February  | $Y = 0.9847 \cdot X - 0.26$                                   | 0.957          |
| March     | $Y = 0.9500 \cdot X - 0.07$                                   | 0.953          |
| April     | $Y = 0.9640 \cdot X - 0.09$                                   | 0.948          |
| May       | $Y = 0.9882 \cdot X - 0.34$                                   | 0.943          |
| June      | $Y = 1.0136 \cdot X - 0.69$                                   | 0.942          |
| July      | $Y = 0.9961 \cdot X - 0.30$                                   | 0.915          |
| August    | $Y = 1.0010 \cdot X - 0.38$                                   | 0.926          |
| September | $Y = 0.9416 \cdot X + 0.52$                                   | 0.946          |
| October   | $Y = 0.9443 \cdot X + 0.14$                                   | 0.970          |
| November  | $Y = 0.9408 \cdot X - 0.11$                                   | 0.977          |
| December  | $Y = 0.9408 \cdot X - 0.35$                                   | 0.968          |

**Table S2.** Transfer functions from *CUS\_ARPAV* to *OB\_ARPAV* for minimum temperature.

| 1980-2022 | <i>CUS_ARPAV</i> to <i>OB_ARPAV</i> |                |
|-----------|-------------------------------------|----------------|
| Month     | Tmin (°C)                           | r <sup>2</sup> |
| January   | $Y = 0.9701 \cdot X + 0.28$         | 0.968          |
| February  | $Y = 0.9913 \cdot X + 0.39$         | 0.921          |
| March     | $Y = 0.9781 \cdot X + 0.65$         | 0.910          |
| April     | $Y = 0.9915 \cdot X + 0.79$         | 0.906          |
| May       | $Y = 1.0328 \cdot X + 0.43$         | 0.904          |
| June      | $Y = 1.0617 \cdot X + 0.02$         | 0.909          |
| July      | $Y = 1.0380 \cdot X + 0.54$         | 0.872          |
| August    | $Y = 1.0403 \cdot X + 0.52$         | 0.884          |
| September | $Y = 0.9749 \cdot X + 1.36$         | 0.910          |
| October   | $Y = 0.9735 \cdot X + 0.99$         | 0.934          |
| November  | $Y = 0.9682 \cdot X + 0.70$         | 0.954          |
| December  | $Y = 0.9758 \cdot X + 0.32$         | 0.939          |

**Table S3.** Transfer functions from *OB\_UNIPD* of the period 1 Jan 1980 – 31 Dec 1983 to *OB\_ARPAV* for maximum temperature.

| 1980-2022 | <i>OB_UNIPD</i> (1 Jan 1980 – 31 Dec 1983) to <i>OB_ARPAV</i> |                |
|-----------|---------------------------------------------------------------|----------------|
| Month     | Tmax (°C)                                                     | r <sup>2</sup> |
| January   | $Y = 0.9938 \cdot X + 0.65$                                   | 0.996          |
| February  | $Y = 0.9803 \cdot X + 0.84$                                   | 0.978          |
| March     | $Y = 1.0032 \cdot X + 0.70$                                   | 0.980          |
| April     | $Y = 1.0160 \cdot X + 0.40$                                   | 0.975          |
| May       | $Y = 1.0117 \cdot X + 0.27$                                   | 0.977          |
| June      | $Y = 0.9983 \cdot X + 0.46$                                   | 0.975          |
| July      | $Y = 0.9992 \cdot X + 0.46$                                   | 0.967          |
| August    | $Y = 1.0147 \cdot X + 0.04$                                   | 0.971          |
| September | $Y = 0.9868 \cdot X + 0.69$                                   | 0.969          |
| October   | $Y = 0.9731 \cdot X + 0.80$                                   | 0.971          |
| November  | $Y = 0.9529 \cdot X + 0.97$                                   | 0.973          |
| December  | $Y = 0.9675 \cdot X + 0.89$                                   | 0.959          |

**Table S4.** Transfer functions from *OB\_UNIPD* of the period 1 Jan 1984 – 30 Sep 1993 to *OB\_ARPAV* for maximum temperature.

| 1980-2022 | <i>OB_UNIPD</i> (1 Jan 1984 – 30 Sep 1993) to <i>OB_ARPAV</i> |                |
|-----------|---------------------------------------------------------------|----------------|
| Month     | Tmax (°C)                                                     | r <sup>2</sup> |
| January   | $Y = 1.0010 \cdot X - 0.31$                                   | 0.992          |
| February  | $Y = 0.9739 \cdot X - 0.02$                                   | 0.969          |
| March     | $Y = 0.9979 \cdot X - 0.13$                                   | 0.968          |
| April     | $Y = 1.0112 \cdot X - 0.34$                                   | 0.966          |
| May       | $Y = 1.0088 \cdot X - 0.38$                                   | 0.971          |
| June      | $Y = 1.0044 \cdot X - 0.33$                                   | 0.968          |
| July      | $Y = 1.0047 \cdot X - 0.27$                                   | 0.960          |
| August    | $Y = 1.0274 \cdot X - 0.92$                                   | 0.962          |
| September | $Y = 0.9983 \cdot X - 0.26$                                   | 0.962          |
| October   | $Y = 0.9742 \cdot X + 0.01$                                   | 0.964          |
| November  | $Y = 0.9490 \cdot X + 0.21$                                   | 0.964          |
| December  | $Y = 0.9611 \cdot X + 0.00$                                   | 0.951          |

**Table S5.** Transfer functions from *OB\_micros\_UNIPD* to *OB\_ARPAV* for maximum temperature.

| 1980-2022 | <i>OB_micros_UNIPD</i> to <i>OB_ARPAV</i> |                |
|-----------|-------------------------------------------|----------------|
| Month     | Tmax (°C)                                 | r <sup>2</sup> |
| January   | $Y = 1.0401 \cdot X - 0.15$               | 0.997          |
| February  | $Y = 1.0661 \cdot X - 0.29$               | 0.988          |
| March     | $Y = 1.0795 \cdot X - 0.44$               | 0.988          |
| April     | $Y = 1.0900 \cdot X - 0.72$               | 0.983          |
| May       | $Y = 1.0831 \cdot X - 0.80$               | 0.986          |
| June      | $Y = 1.0748 \cdot X - 0.77$               | 0.985          |
| July      | $Y = 1.0738 \cdot X - 0.77$               | 0.975          |
| August    | $Y = 1.0836 \cdot X - 1.02$               | 0.977          |
| September | $Y = 1.0703 \cdot X - 0.71$               | 0.980          |
| October   | $Y = 1.0546 \cdot X - 0.48$               | 0.982          |
| November  | $Y = 1.0238 \cdot X - 0.05$               | 0.983          |
| December  | $Y = 1.0410 \cdot X - 0.17$               | 0.972          |
